# Supplementary material for: PIK3CA Mutations Frequently Coexist with EGFR/KRAS Mutations in Non-Small Cell Lung Cancer and Suggest Poor Prognosis in EGFR/KRAS Wildtype Subgroup
Source: PubMed Central journal article supplement (PMC3922761; doi:10.1371/journal.pone.0088291), 2014-02-12
Supplement: pone.0088291.s001.pdf [file pone.0088291.s001.pdf]

Figure S1

A

Normal

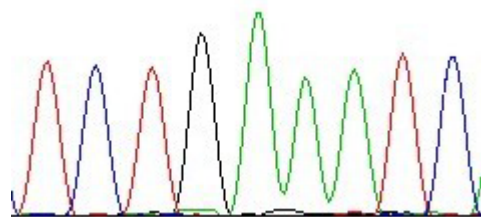

Mutation

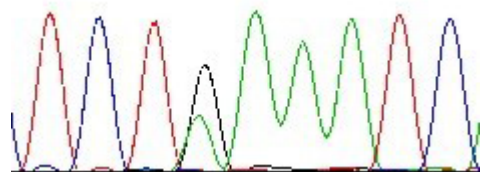

T C T G A A A T C

G1624A (E542K)

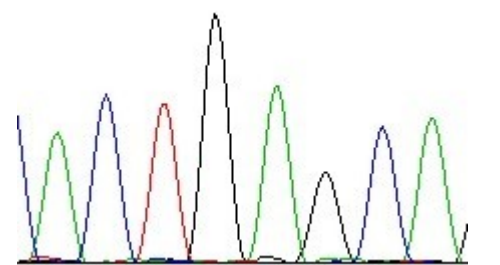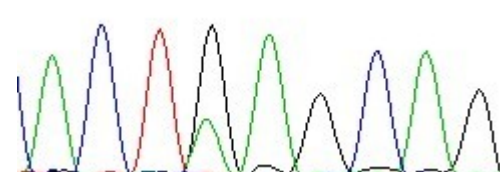

A C T G A G C A

G1633A (E545K)

B

Normal

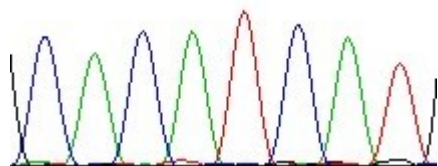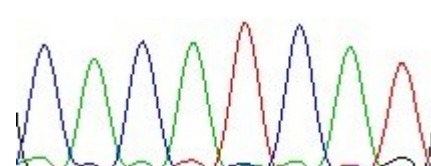

Mutation

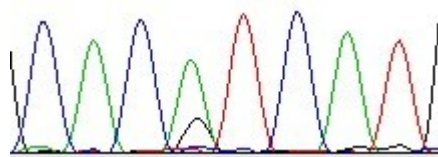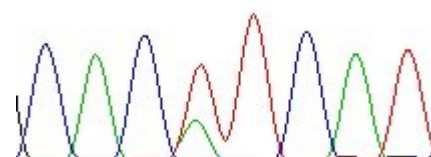

C A C A T C A T

A3140G(H1047R)

C A C A T C A T

A3140L (H1047L)

Figure S2

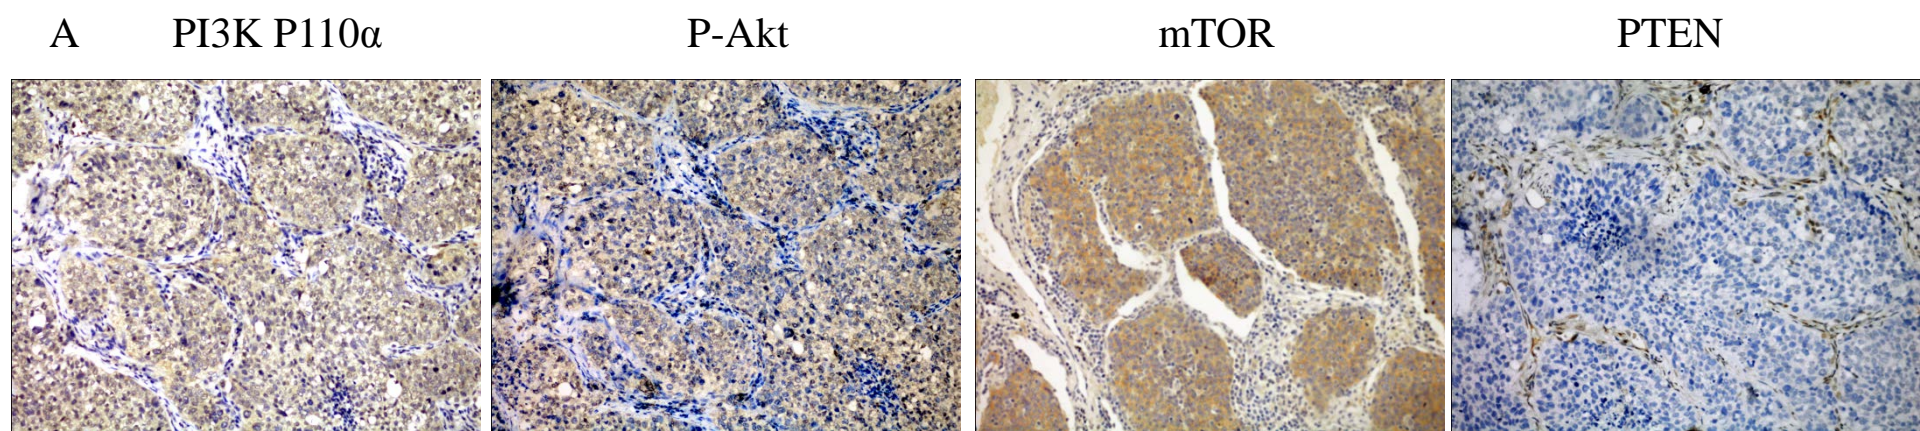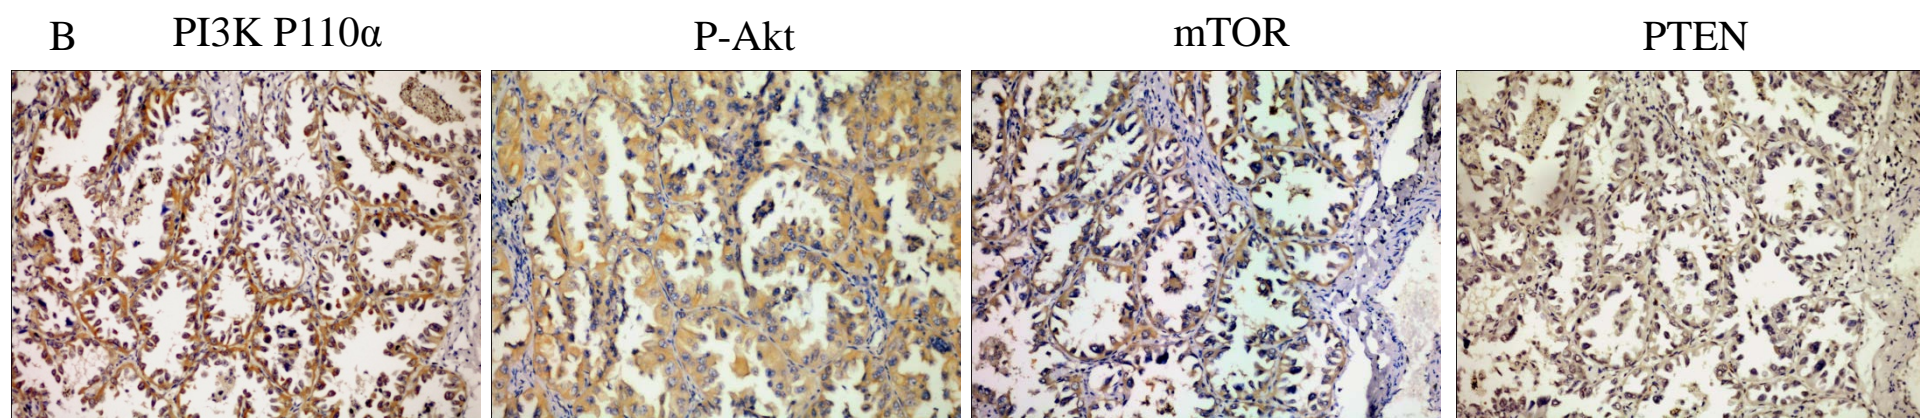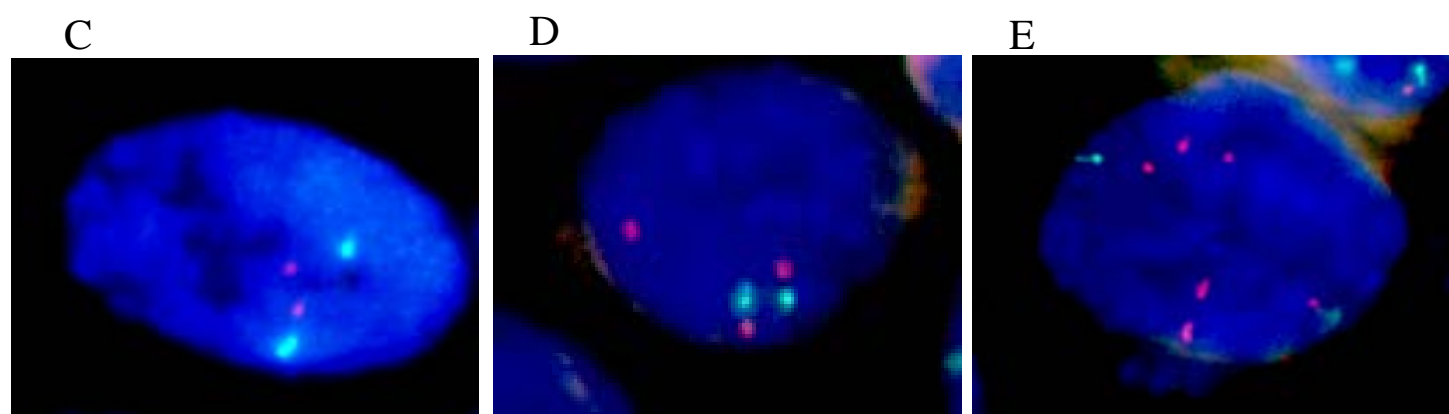

Figure S3

A

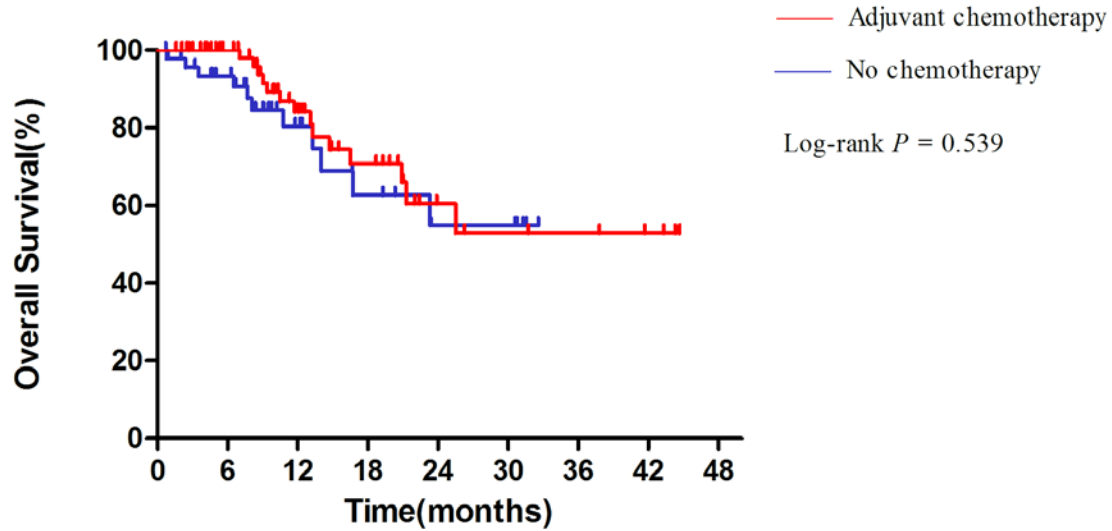

B

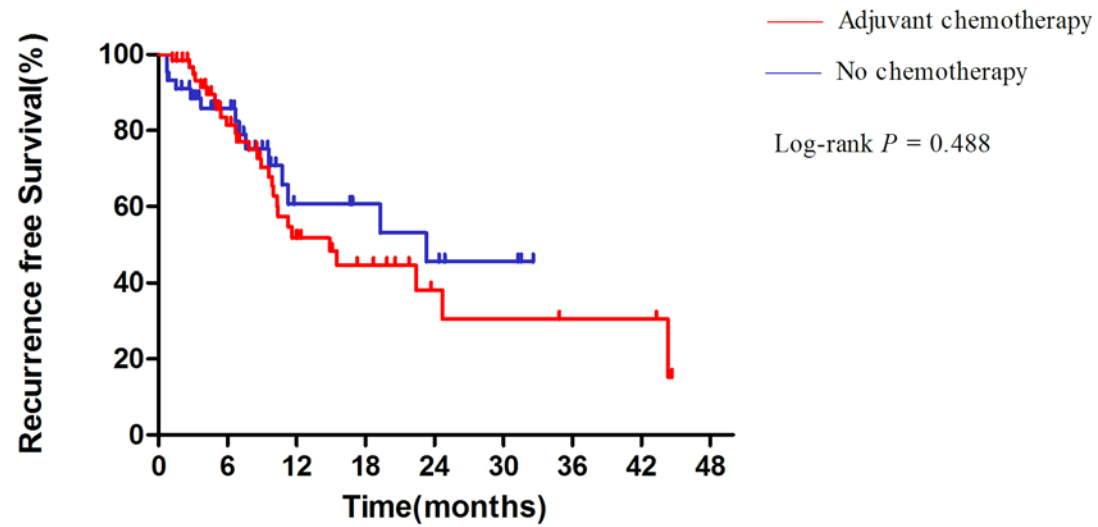

Figure S4

A

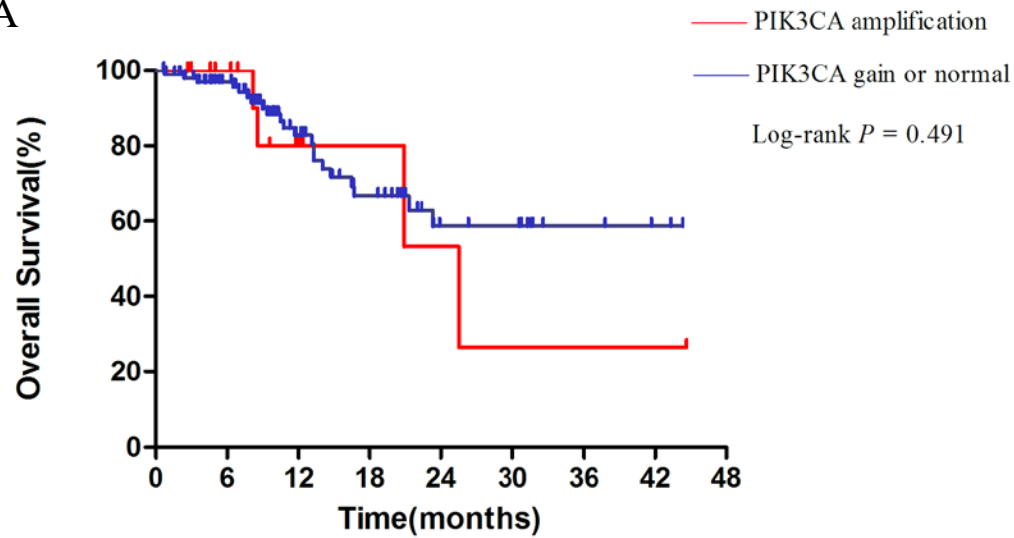

B

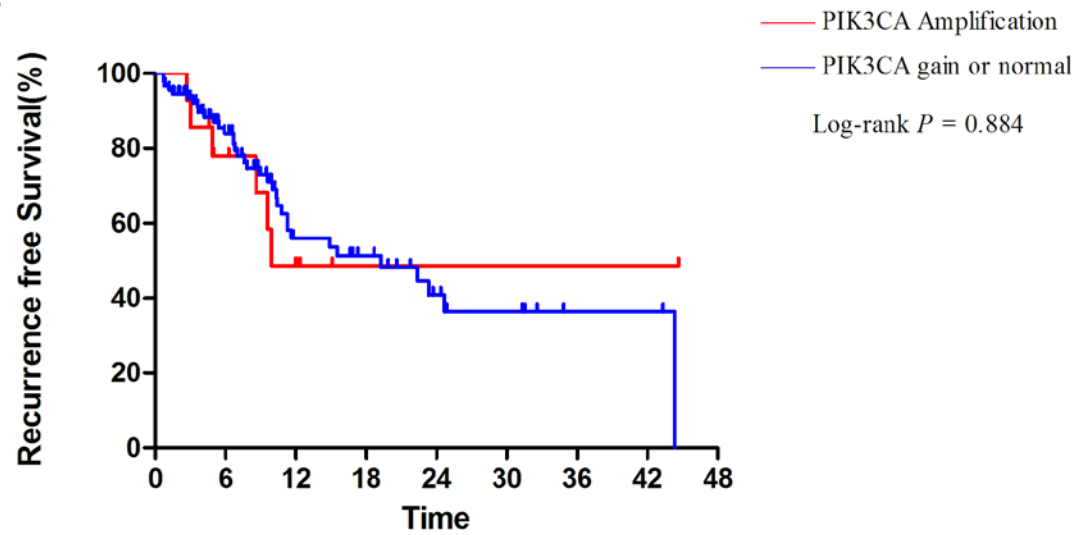

**Table S1** Comparison of *PIK3CA* helical(exon9) and kinase(exon20) domain mutation

| Characteristics         | Helical<br>N (%) | Kinase<br>N (%) | <i>p</i> -value |
|-------------------------|------------------|-----------------|-----------------|
| Stage                   |                  |                 |                 |
| I                       | 6(28.6)          | 7(53.8)         |                 |
| II~IV                   | 15(71.4)         | 6(46.2)         | 0.141           |
| Lymph node metastasis   |                  |                 |                 |
| N0                      | 8(38.1)          | 7(53.8)         | 0.369           |
| N+                      | 13(61.9)         | 6(46.2)         |                 |
| Smoking history         |                  |                 |                 |
| Never                   | 9(42.9)          | 7(53.8)         |                 |
| Former/current          | 12(57.1)         | 6(46.2)         | 0.533           |
| Differentiation         |                  |                 |                 |
| Well                    | 2(9.5)           | 2(15.4)         | 0.606           |
| Moderately or<br>poorly | 19(90.5)         | 11(84.6)        |                 |
| Pathological types      |                  |                 |                 |
| AD                      | 13(61.9)         | 9(69.2)         | 0.727           |
| SCC                     | 8(38.1)          | 4(30.8)         |                 |
| Age                     |                  |                 |                 |
| ≤60                     | 11(52.4)         | 9(69.2)         | 0.477           |
| >60                     | 10(47.6)         | 4(30.8)         |                 |
| Gender                  |                  |                 |                 |
| Male                    | 15(71.4)         | 6(46.2)         | 0.141           |
| Female                  | 6(28.6)          | 7(53.8)         |                 |
| Co-mutation             |                  |                 |                 |
| Yes                     | 13(61.9)         | 8(61.5)         |                 |
| No                      | 8(38.1)          | 5(38.5)         | 0.983           |

N+: lymph node metastasis positive; AD: adenocarcinoma; SCC:squamous cell carcinoma

**Table S2** *ALK* rearrangement in 1117 NSCLC patients

| Patients ID | Pathology | PCR                        | FISH |
|-------------|-----------|----------------------------|------|
| 245         | AD        | E13;A20                    | +    |
| 324         | AD        | E20;A20                    | +    |
| 347         | AD        | E20;A20                    | +    |
| 399         | AD        | E6a/b;A20                  | +    |
| 460         | AD        | E13;A20                    | +    |
| 490         | AD        | E6a/b;A20                  | +    |
| 578         | AD        | E13;A20                    | +    |
| 584         | AD        | E17;A20                    | +    |
| 591         | AD        | E6a/b;A20                  | +    |
| 636         | AD        | E13;A20                    | +    |
| 667         | AD        | E13;A20                    | +    |
| 732         | AD        | E20;A20                    | +    |
| 737         | AD        | E17 ins 65;A20             | +    |
| 781         | AD        | E6b;A20                    | +    |
| 782         | AD        | E6a/b;A20                  | +    |
| 788         | AD        | E6a/b;A20                  | +    |
| 834         | AD        | E13;A20                    | +    |
| 877         | AD        | E20;A20                    | +    |
| 964         | AD        | E20;A20                    | +    |
| 966         | AD        | E20;A20                    | +    |
| 974         | AD        | E13;A20                    | +    |
| 981         | AD        | E17b ins 39;A20            | +    |
| 988         | AD        | E10a/b, E13;A20            | +    |
| 1003        | AD        | E13;A20                    | +    |
| 1004        | AD        | E13;A20                    | +    |
| 1228        | AD        | E13;A20                    | +    |
| 1335        | AD        | E13;A20                    | +    |
| 1336        | AD        | E13;A20                    | +    |
| 1451        | AD        | E13;A20                    | +    |
| 1459        | AD        | E13;A20                    | +    |
| 1494        | AD        | (E6a/b:ALK intron 18bp:A20 | +    |
| 1514        | AD        | E6a/b;A20                  | +    |
| B56         | AD        | E6a/b;A20                  | +    |

NOTE: +, positive; AD, adenocarcinoma;

**Table S3** Correlations between *PIK3CA* mutations and other gene alterations in lung adenocarcinoma.

| Gene alteration |               | <i>PIK3CA</i> mutant<br>N (%) | <i>PIK3CA</i> wildtype<br>N (%) | <i>p</i> -Value |
|-----------------|---------------|-------------------------------|---------------------------------|-----------------|
| <i>EGFR</i>     | mutant        | 16(72.7)                      | 506(64.5)                       | 0.424           |
|                 | wildtype      | 6(27.3)                       | 279(35.5)                       |                 |
| <i>KRAS</i>     | mutant        | 3(13.6)                       | 56(7.1)                         | 0.213           |
|                 | wildtype      | 19(86.4)                      | 729(92.9)                       |                 |
| <i>HER2</i>     | mutant        | 0(0.0)                        | 19(2.4)                         | 1.000           |
|                 | wildtype      | 22(100.0)                     | 766(97.6)                       |                 |
| <i>BRAF</i>     | mutant        | 0(0.0)                        | 10(1.3)                         | 1.000           |
|                 | wildtype      | 22(100.0)                     | 775(98.7)                       |                 |
| <i>AKT1</i>     | mutant        | 0(0.0)                        | 1(0.1)                          | 1.000           |
|                 | wildtype      | 22(100.0)                     | 784(99.9)                       |                 |
| <i>ALK</i>      | rearrangement | 0(0.0)                        | 31(3.9)                         | 1.000           |
|                 | wildtype      | 22(100.0)                     | 754(96.1)                       |                 |

**Table S4** Correlations between *PIK3CA* mutations and other gene alterations in lung squamous cell carcinoma

| Gene alteration |               | <i>PIK3CA</i> mutant<br>N (%) | <i>PIK3CA</i> wildtype<br>N (%) | <i>p</i> -Value |
|-----------------|---------------|-------------------------------|---------------------------------|-----------------|
| <i>EGFR</i>     | mutant        | 1(8.3)                        | 13(4.4)                         | 0.432           |
|                 | wildtype      | 11(91.7)                      | 285(95.6)                       |                 |
| <i>KRAS</i>     | mutant        | 1(8.3)                        | 7(2.3)                          | 0.274           |
|                 | wildtype      | 11(91.7)                      | 291(97.7)                       |                 |
| <i>HER2</i>     | mutant        | 0(0.0)                        | 1(0.3)                          | 1.000           |
|                 | wildtype      | 12(100.0)                     | 297(99.7)                       |                 |
| <i>BRAF</i>     | mutant        | 0(0.0)                        | 1(0.3)                          | 1.000           |
|                 | wildtype      | 12(100.0)                     | 297(97.7)                       |                 |
| <i>AKT1</i>     | mutant        | 0(0.0)                        | 1(0.3)                          | 1.000           |
|                 | wildtype      | 12(100.0)                     | 297(97.7)                       |                 |
| <i>ALK</i>      | rearrangement | 0(0.0)                        | 2(0.7)                          | 1.000           |
|                 | wildtype      | 12(100.0)                     | 296(99.3)                       |                 |



**Table S5** Comparison of patients with single *PIK3CA* mutation to those with *PIK3CA* and other oncogene mutation

| Characteristics          | Coexistence of <i>PIK3CA</i> and <i>EGFR/KRAS</i> mutations<br>N(%) | Patients with <i>PIK3CA</i> mutation only<br>N(%) | <i>p</i> -value   |
|--------------------------|---------------------------------------------------------------------|---------------------------------------------------|-------------------|
| Stage                    |                                                                     |                                                   |                   |
| I                        | 8(38.1)                                                             | 4(30.8)                                           | 0.727             |
| II~IV                    | 13(61.9)                                                            | 9(69.2)                                           |                   |
| Smoking history          |                                                                     |                                                   |                   |
| Never smoker             | 13(61.9)                                                            | 3(23.1)                                           | 0.039             |
| Current or former smoker | 8(38.1)                                                             | 10(76.9)                                          |                   |
| Pathological types       |                                                                     |                                                   |                   |
| AD                       | 19(90.5)                                                            | 3(23.1)                                           | <b>&lt;0.0001</b> |
| SCC                      | 2(9.5)                                                              | 10(76.9)                                          |                   |
| Age                      |                                                                     |                                                   |                   |
| ≤60                      | 15(71.4)                                                            | 6(46.2)                                           | 0.168             |
| >60                      | 6(28.6)                                                             | 7(53.8)                                           |                   |
| Gender                   |                                                                     |                                                   |                   |
| Male                     | 10(47.6)                                                            | 11(84.6)                                          | 0.067             |
| Female                   | 11(52.4)                                                            | 2(15.4)                                           |                   |
| Domain                   |                                                                     |                                                   |                   |
| Helical domain           | 13(61.9)                                                            | 8(61.5)                                           | 1.000             |
| Kinase domain            | 8(38.1)                                                             | 5(38.5)                                           |                   |

AD: adenocarcinoma; SCC: squamous cell carcinoma

**Table S6** Histopathological subtype in 785 *PIK3CA* wildtype and 22 *PIK3CA* mutant patients with lung adenocarcinoma

| Histologic subtype         | <i>PIK3CA</i> mutations patients<br>N (%) | <i>PIK3CA</i> Wild type patients<br>N (%) | <i>p</i> -Value |
|----------------------------|-------------------------------------------|-------------------------------------------|-----------------|
| AIS                        | 1(4.5)                                    | 5(0.6)                                    |                 |
| MIA                        | 0(0.0)                                    | 13(1.5)                                   |                 |
| Lepidic predominant        | 2(9.1)                                    | 53(6.8)                                   |                 |
| Acinar predominant         | 11(50)                                    | 412(52.5)                                 |                 |
| Papillary predominant      | 1(4.5)                                    | 121(15.4)                                 |                 |
| Micropapillary predominant | 0(0.0)                                    | 16(2.0)                                   |                 |
| Solid predominant          | 6(27.3)                                   | 137(17.5)                                 |                 |
| IMA                        | 1(4.5)                                    | 25(3.2)                                   |                 |
| Enteric predominant        | 0(0.0)                                    | 3(0.4)                                    | 0.082           |

AIS: adenocarcinoma in situ; MIA: minimally invasive adenocarcinoma;  
IMA:invasive mucinous adenocarcinoma

**Table S7** Comparison of histopathological subtype between lung adenocarcinoma patients only with *PIK3CA* mutation and those co-exited with *EGFR/KRAS* mutation

| Histologic subtype    | Patients with <i>PIK3CA</i> and <i>EGFR/KRAS</i> mutations N(%) | Patients with <i>PIK3CA</i> mutation only N(%) | <i>p</i> -Value |
|-----------------------|-----------------------------------------------------------------|------------------------------------------------|-----------------|
| AIS                   | 0(0.0)                                                          | 1(33.3)                                        |                 |
| Lepidic predominant   | 2(10.5)                                                         | 0(0.0)                                         |                 |
| Acinar predominant    | 10(52.6)                                                        | 1(33.3)                                        |                 |
| Papillary predominant | 1(5.3)                                                          | 0(0.0)                                         |                 |
| Solid predominant     | 5(26.3)                                                         | 1(33.3)                                        |                 |
| IMA                   | 1(5.3)                                                          | 0(0.0)                                         | 0.121           |

AIS: adenocarcinoma in situ; IMA:invasive mucinous adenocarcinoma

**Table S8** Associations of PI3K p110  $\alpha$ , p-Akt, mTOR, PTEN expression and *PIK3CA* amplification with clinicopathologic characteristics of 34 patients in *PIK3CA* mutant group

| Characteristics       | PI3K p110 $\alpha$ |         |                | PTEN loss |          |                | p-Akt    |          |                   | m TOR     |         |                   |
|-----------------------|--------------------|---------|----------------|-----------|----------|----------------|----------|----------|-------------------|-----------|---------|-------------------|
|                       | +(%)               | -(%)    | <i>P</i> value | +(%)      | -(%)     | <i>P</i> value | +(%)     | -(%)     | <i>P</i> value    | +(%)      | -(%)    | <i>P</i> value    |
| Stage                 |                    |         |                |           |          |                |          |          |                   |           |         |                   |
| I                     | 8(61.5)            | 5(38.5) | <b>0.043</b>   | 2(15.4)   | 11(84.6) | 0.444          | 8(61.5)  | 5(38.5)  | 0.429             | 8(61.5)   | 5(38.5) | 0.254             |
| II ~IV                | 19(90.5)           | 2(9.5)  |                | 6(28.6)   | 15(71.4) |                | 10(47.6) | 11(52.4) |                   | 17(81.0)  | 4(19.0) |                   |
| Lymph node metastasis |                    |         |                |           |          |                |          |          |                   |           |         |                   |
| N0                    | 11(73.3)           | 4(26.7) | 0.672          | 3(20.0)   | 12(80.0) | 1.000          | 10(66.7) | 5(33.3)  | 0.154             | 11(73.3)  | 4(26.7) | 1.000             |
| N+                    | 16(84.2)           | 3(15.8) |                | 5(26.3)   | 14(73.7) |                | 8(42.1)  | 11(57.9) |                   | 14(73.7)  | 5(26.3) |                   |
| Smoking history       |                    |         |                |           |          |                |          |          |                   |           |         |                   |
| Never smoker          | 11(68.8)           | 5(31.3) | 0.214          | 2(12.5)   | 14(87.5) | 0.233          | 10(62.5) | 6(37.5)  | 0.327             | 12(75.0)  | 4(25.0) | 1.000             |
| C/F smoker            | 16(88.9)           | 2(11.1) |                | 6(33.3)   | 12(66.7) |                | 8(44.4)  | 10(55.6) |                   | 13(72.2)  | 5(27.8) |                   |
| Differentiation       |                    |         |                |           |          |                |          |          |                   |           |         |                   |
| Well                  | 3(75.0)            | 1(25.0) | 1.000          | 1(25.0)   | 3(75.0)  | 1.000          | 1(25.0)  | 3(75.0)  | 0.323             | 3(75.0)   | 1(25.0) | 0.610             |
| Moderately or poorly  | 24(80.0)           | 6(20.0) |                | 7(23.3)   | 23(76.7) |                | 17(56.7) | 13(43.2) |                   | 22(73.3)  | 8(26.7) |                   |
| Pathological types    |                    |         |                |           |          |                |          |          |                   |           |         |                   |
| AD                    | 17(77.3)           | 5(22.7) | 1.000          | 4(18.2)   | 18(81.8) | 0.410          | 12(54.5) | 10(15.5) | 0.800             | 15(68.2)  | 7(31.8) | 0.439             |
| SCC                   | 10(83.3)           | 2(16.7) |                | 4(33.3)   | 8(66.7)  |                | 6(50.0)  | 6(50.0)  |                   | 10(83.3)  | 2(16.7) |                   |
| Age                   |                    |         |                |           |          |                |          |          |                   |           |         |                   |
| ≤60                   | 15(71.4)           | 6(28.6) | 0.210          | 5(23.8)   | 16(76.2) | 0.262          | 12(57.1) | 9(42.9)  | 0.533             | 15(71.4)  | 6(28.6) | 1.000             |
| >60                   | 12(92.3)           | 1(7.7)  |                | 6(46.2)   | 7(53.8)  |                | 6(46.2)  | 7(53.8)  |                   | 10(76.9)  | 3(23.1) |                   |
| Gender                |                    |         |                |           |          |                |          |          |                   |           |         |                   |
| Male                  | 18(85.7)           | 3(14.3) | 0.387          | 6(28.6)   | 15(71.4) | 0.444          | 11(52.4) | 10(47.6) | 0.934             | 16(76.2)  | 5(23.8) | 0.704             |
| Female                | 9(69.2)            | 4(30.8) |                | 2(15.4)   | 11(84.6) |                | 7(53.8)  | 6(46.2)  |                   | 9(69.2)   | 4(30.8) |                   |
| PI3K p110 $\alpha$    |                    |         |                |           |          |                |          |          |                   |           |         |                   |
| +                     | NA                 |         |                | 7(25.9)   | 20(74.1) | 1.000          | 17(63.0) | 10(37.0) | <b>0.035</b>      | 23(85.2)  | 4(14.8) | <b>0.007</b>      |
| -                     |                    |         |                | 1(14.3)   | 6(85.7)  |                | 1(14.3)  | 6(85.7)  |                   | 2(28.6)   | 5(71.4) |                   |
| PTEN loss             |                    |         |                |           |          |                |          |          |                   |           |         |                   |
| +                     | 7(87.5)            | 1(12.5) | 1.000          | NA        |          |                | 4(50.0)  | 4(50.0)  | 1.000             | 7(87.5)   | 1(12.5) | 0.403             |
| -                     | 20(76.9)           | 6(23.1) |                |           |          |                | 14(53.8) | 12(46.2) |                   | 18(69.2)  | 8(30.8) |                   |
| p-Akt                 |                    |         |                |           |          |                |          |          |                   |           |         |                   |
| +                     | 17(94.4)           | 1(5.6)  | <b>0.035</b>   | 4(22.2)   | 14(77.8) | 1.000          | NA       |          |                   | 18(100.0) | 0(0.0)  | <b>&lt;0.0001</b> |
| -                     | 10(62.5)           | 6(37.5) |                | 4(25.0)   | 12(75.0) |                |          |          |                   | 7(43.8)   | 9(56.3) |                   |
| m TOR                 |                    |         |                |           |          |                |          |          |                   |           |         |                   |
| +                     | 23(92.0)           | 2(8.0)  | <b>0.007</b>   | 7(28.0)   | 18(72.0) | 0.403          | 18(72.0) | 7(28.0)  | <b>&lt;0.0001</b> | NA        |         |                   |
| -                     | 4(44.4)            | 5(55.6) |                | 1(11.1)   | 8(88.9)  |                | 0(0.0)   | 9(100.0) |                   |           |         |                   |

N+: lymph node metastasis positive; C/F: current/former; AD: adenocarcinoma; SCC; squamous cell carcinoma; NA: Not applicable

**Table S9** Associations of PI3K p110  $\alpha$ , p-Akt, mTOR, PTEN expression and *PIK3CA* amplification with clinicopathologic characteristics of 108 patients in *PIK3CA* wild-type group

| Characteristics       | PI3K p110 $\alpha$ |          |                   | PTEN loss |          |                | p-Akt    |          |                   | m TOR    |          |                   |
|-----------------------|--------------------|----------|-------------------|-----------|----------|----------------|----------|----------|-------------------|----------|----------|-------------------|
|                       | +(%)               | -(%)     | <i>P</i> value    | +(%)      | -(%)     | <i>P</i> value | +(%)     | -(%)     | <i>P</i> value    | +(%)     | -(%)     | <i>P</i> value    |
| Stage                 |                    |          |                   |           |          |                |          |          |                   |          |          |                   |
| I                     | 8(29.6)            | 19(70.4) |                   | 5(18.5)   | 22(81.5) |                | 8(29.6)  | 19(70.4) |                   | 13(48.1) | 14(51.9) |                   |
| II ~IV                | 33(40.7)           | 48(59.3) | 0.303             | 23(28.4)  | 58(71.6) | 0.310          | 25(30.9) | 56(69.1) | 0.904             | 32(39.5) | 49(60.5) | 0.430             |
| Lymph node metastasis |                    |          |                   |           |          |                |          |          |                   |          |          |                   |
| N0                    | 23(43.4)           | 30(56.6) | 0.253             | 18(34.0)  | 35(66.0) | 0.061          | 17(32.1) | 36(67.9) | 0.736             | 25(47.2) | 28(52.8) | 0.255             |
| N+                    | 18(32.7)           | 37(67.2) |                   | 10(18.2)  | 45(81.8) |                | 16(29.1) | 39(70.9) |                   | 20(36.4) | 35(63.6) |                   |
| Smoking history       |                    |          |                   |           |          |                |          |          |                   |          |          |                   |
| Never smoker          | 12(40.0)           | 18(60.0) | 0.787             | 4(13.3)   | 26(86.7) | 0.064          | 8(26.7)  | 22(73.3) | 0.586             | 13(43.3) | 17(56.7) | 0.528             |
| C/F smoker            | 29(37.2)           | 49(62.8) |                   | 24(30.8)  | 54(69.2) |                | 25(32.1) | 53(67.9) |                   | 32(41.0) | 46(59.0) |                   |
| Differentiation       |                    |          |                   |           |          |                |          |          |                   |          |          |                   |
| Well                  | 1(20.0)            | 4(80.0)  | 0.648             | 2(40.0)   | 3(60.0)  | 0.603          | 1(20.0)  | 4(80.0)  | 1.000             | 3(60.0)  | 2(40.0)  | 0.647             |
| Moderately or poorly  | 40(38.8)           | 63(61.2) |                   | 26(25.2)  | 77(74.8) |                | 32(31.1) | 71(68.9) |                   | 42(40.8) | 61(59.2) |                   |
| Pathological types    |                    |          |                   |           |          |                |          |          |                   |          |          |                   |
| AD                    | 22(39.3)           | 34(60.7) | 0.769             | 13(23.2)  | 43(76.8) | 0.505          | 15(26.8) | 41(73.2) | 0.377             | 22(39.3) | 34(60.7) | 0.602             |
| SCC                   | 19(36.5)           | 33(63.5) |                   | 15(28.8)  | 37(71.2) |                | 18(34.6) | 34(65.4) |                   | 23(44.2) | 29(55.8) |                   |
| Age                   |                    |          |                   |           |          |                |          |          |                   |          |          |                   |
| ≤60                   | 21(42.9)           | 28(57.1) | 0.340             | 11(22.4)  | 38(77.6) | 0.452          | 10(20.4) | 39(79.6) | <b>0.037</b>      | 19(38.8) | 30(61.2) | 0.579             |
| >60                   | 20(33.9)           | 39(66.1) |                   | 17(28.8)  | 42(71.2) |                | 23(39.0) | 36(61.0) |                   | 26(44.1) | 33(55.9) |                   |
| Gender                |                    |          |                   |           |          |                |          |          |                   |          |          |                   |
| Male                  | 34(37.8)           | 56(62.2) | 0.929             | 24(26.7)  | 66(73.3) | 0.694          | 30(33.3) | 60(66.7) | 0.161             | 36(40.0) | 54(60.0) | 0.579             |
| Female                | 7(42.2)            | 11(61.1) |                   | 4(22.2)   | 14(77.8) |                | 3(16.7)  | 15(83.3) |                   | 9(50.0)  | 9(50.0)  |                   |
| PI3K p110 $\alpha$    |                    |          |                   |           |          |                |          |          |                   |          |          |                   |
| +                     | NA                 |          |                   | 7(17.1)   | 34(82.9) | 0.101          | 23(56.1) | 18(43.9) | <b>&lt;0.0001</b> | 32(78.0) | 9(22.0)  | <b>&lt;0.0001</b> |
| -                     |                    |          |                   | 21(31.3)  | 46(68.7) |                | 10(14.9) | 57(85.1) |                   | 13(19.4) | 54(80.6) |                   |
| PTEN loss             |                    |          |                   |           |          |                |          |          |                   |          |          |                   |
| +                     | 7(25.0)            | 21(75.0) | 0.101             | NA        |          |                | 7(25.0)  | 21(75.0) | 0.458             | 8(28.6)  | 20(71.4) | 0.102             |
| -                     | 34(42.5)           | 46(57.5) |                   |           |          |                | 26(32.5) | 54(67.5) |                   | 37(46.3) | 43(53.8) |                   |
| p-Akt                 |                    |          |                   |           |          |                |          |          |                   |          |          |                   |
| +                     | 23(69.7)           | 10(30.3) | <b>&lt;0.0001</b> | 7(21.2)   | 26(78.8) | 0.458          | NA       |          |                   | 21(63.6) | 12(36.4) | <b>0.002</b>      |
| -                     | 18(24.0)           | 57(76.0) |                   | 21(28.0)  | 54(72.0) |                |          |          |                   | 24(32.0) | 51(68.0) |                   |
| m TOR                 |                    |          |                   |           |          |                |          |          |                   |          |          |                   |
| +                     | 32(71.1)           | 13(28.9) | <b>&lt;0.0001</b> | 8(17.8)   | 37(82.2) | 0.102          | 21(46.7) | 24(53.3) | <b>0.002</b>      | NA       |          |                   |
| -                     | 9(14.3)            | 54(85.7) |                   | 20(31.7)  | 43(68.3) |                | 12(19.0) | 51(81.0) |                   |          |          |                   |

N+: lymph node metastasis positive; C/F: current/former; AD: adenocarcinoma; SCC; squamous cell carcinoma; NA: Not applicable

**Table S10** Associations of PI3K p110 $\alpha$ , p-Akt , mTOR, PTEN expression and *PIK3CA* amplification with clinicopathologic characteristics

| Characteristics       | <i>PIK3CA</i> amplification in <i>PIK3CA</i> mutant group |           |                | <i>PIK3CA</i> amplification in <i>PIK3CA</i> wildtype group |           |                   |
|-----------------------|-----------------------------------------------------------|-----------|----------------|-------------------------------------------------------------|-----------|-------------------|
|                       | +(%)                                                      | -(%)      | <i>P</i> value | +(%)                                                        | -(%)      | <i>P</i> value    |
| Stage                 |                                                           |           |                |                                                             |           |                   |
| I                     | 2(15.4)                                                   | 11(84.6)  | 1.000          | 6(22.2)                                                     | 21(77.8)  | 0.783             |
| II ~IV                | 3(14.3)                                                   | 18(85.7)  |                | 16(19.8)                                                    | 65(80.2)  |                   |
| Lymph node metastasis |                                                           |           |                |                                                             |           |                   |
| N0                    | 3(20.0)                                                   | 12(80.0)  | 0.634          | 12(22.6)                                                    | 41(77.4)  | 0.565             |
| N+                    | 2(10.5)                                                   | 17(89.5)  |                | 10(18.2)                                                    | 45(81.8)  |                   |
| Smoking history       |                                                           |           |                |                                                             |           |                   |
| Never smoker          | 2(12.5)                                                   | 14(87.5)  | 1.000          | 0(0)                                                        | 30(100.0) | <b>0.001</b>      |
| Current/former smoker | 3(16.7)                                                   | 15(83.3)  |                | 22(28.2)                                                    | 56(71.8)  |                   |
| Differentiation       |                                                           |           |                |                                                             |           |                   |
| Well                  | 1(25.0)                                                   | 3(75.0)   | 0.488          | 0(0)                                                        | 5(100.0)  | 0.581             |
| Moderately or poorly  | 4(13.3)                                                   | 26(86.7)  |                | 22(21.4)                                                    | 81(78.6)  |                   |
| Pathological types    |                                                           |           |                |                                                             |           |                   |
| AD                    | 1(4.5)                                                    | 21(95.5)  | <b>0.042</b>   | 3(5.4)                                                      | 53(94.6)  | <b>&lt;0.0001</b> |
| SCC                   | 4(33.3)                                                   | 8(66.7)   |                | 19(36.5)                                                    | 33(63.5)  |                   |
| Age                   |                                                           |           |                |                                                             |           |                   |
| $\leq 60$             | 2(9.5)                                                    | 19(90.5)  | 0.348          | 8(16.3)                                                     | 41(83.7)  | 0.342             |
| $>60$                 | 3(23.1)                                                   | 10(76.9)  |                | 14(23.7)                                                    | 45(76.3)  |                   |
| Gender                |                                                           |           |                |                                                             |           |                   |
| Male                  | 4(19.0)                                                   | 17(81.0)  | 0.627          | 22(24.4)                                                    | 68(75.6)  | <b>0.021</b>      |
| Female                | 1(7.7)                                                    | 12(92.3)  |                | 0(0)                                                        | 18(100.0) |                   |
| PI3K p110 $\alpha$    |                                                           |           |                |                                                             |           |                   |
| +                     | 5(18.5)                                                   | 22(81.5)  | 0.559          | 7(17.1)                                                     | 34(82.9)  | 0.506             |
| -                     | 0(0)                                                      | 7(100.0)  |                | 15(22.4)                                                    | 52(77.6)  |                   |
| PTEN loss             |                                                           |           |                |                                                             |           |                   |
| +                     | 2(25.0)                                                   | 6(75.0)   | 0.570          | 7(25.0)                                                     | 21(75.0)  | 0.480             |
| -                     | 3(11.5)                                                   | 23(88.5)  |                | 15(18.8)                                                    | 65(81.3)  |                   |
| p-Akt                 |                                                           |           |                |                                                             |           |                   |
| +                     | 4(22.2)                                                   | 14(77.8)  | 0.340          | 6(18.2)                                                     | 27(81.8)  | 0.708             |
| -                     | 1(6.3)                                                    | 15((93.8) |                | 16(21.3)                                                    | 59(78.7)  |                   |
| m TOR                 |                                                           |           |                |                                                             |           |                   |
| +                     | 5(20.0)                                                   | 20(80.0)  | 0.293          | 10(22.2)                                                    | 35(77.8)  | 0.686             |
| -                     | 0(0)                                                      | 9(100.0)  |                | 12(19.0)                                                    | 51(81.0)  |                   |

N+: lymph node metastasis positive AD: adenocarcinoma;SCC;squamous cell carcinoma

**Supporting information legend:**

**Figure S1** Representative *PIK3CA* mutations by direct sequencing are shown for exon 9(A) and exon 20(B).

**Figure S2** Representative high expression of PI3K P110 $\alpha$ , p-Akt, m TOR and low expression of PTEN protein in lung SCC; original amplification,  $\times 200$  (A); Representative high expression of PI3K, p-Akt, m TOR and PTEN protein in lung AD; original amplification,  $\times 200$  (B); Representative cell nuclei having normal(C), gain (D), and amplified (E) *PIK3CA* signals (red) and two centromeric signals (green).

**Figure S3** Overall survival curves for patients with or without adjuvant chemotherapy (A); Recurrence-free survival curves for patients with or without adjuvant chemotherapy (B).

**Figure S4** Overall survival curves for patients with or without *PIK3CA* amplification (A); Recurrence-free survival curves for patients with or without *PIK3CA* amplification (B).

**Table S1** Comparison of *PIK3CA* helical(exon9) and kinase(exon20) domain mutation.

**Table S2** *ALK* rearrangement in 1117 NSCLC patients

**Table S3** Correlations between *PIK3CA* mutations and other gene alterations in lung adenocarcinoma.

**Table S4** Correlations between *PIK3CA* mutations and other gene alterations in lung squamous cell carcinoma

**Table S5** Comparison of patients with single *PIK3CA* mutation to those with *PIK3CA* and other oncogene mutation

**Table S6** Histopathological subtype in 785 *PIK3CA* wildtype and 22 *PIK3CA* mutant patients with lung adenocarcinoma

**Table S7** Comparison of histopathological subtype between lung adenocarcinoma patients only with *PIK3CA* mutation and those co-exited with *EGFR/KRAS* mutation

**Table S8** Associations of PI3K p110  $\alpha$ , p-Akt, mTOR, PTEN expression and *PIK3CA* amplification with clinicopathologic characteristics of 34 patients in *PIK3CA* mutant group

**Table S9** Associations of PI3K p110  $\alpha$ , p-Akt, mTOR, PTEN expression and *PIK3CA* amplification with clinicopathologic characteristics of 108 patients in *PIK3CA* wild-type group

**Table S10** Associations of PI3K p110 $\alpha$ , p-Akt, mTOR, PTEN expression and *PIK3CA*

amplification with clinicopathologic characteristics
